# Supplementary material
Source: PubMed Central journal article supplement (PMC10861143)
Supplement: NIHMS1964027-supplement-Effects_of_Common_supplementary.pdf [file NIHMS1964027-supplement-Effects_of_Common_supplementary.pdf]

## SUPPORTING INFORMATION:

### **The effects of common e-liquid flavorants and added nicotine on toxicant formation during vaping analyzed by <sup>1</sup>H NMR Spectroscopy**

Paul J. Kerber,<sup>†</sup> Anna K. Duell,<sup>†</sup> Marley Powers,<sup>†</sup> Robert M. Strongin,<sup>†</sup> and David H. Peyton<sup>\*,†</sup>

<sup>†</sup> Department of Chemistry, Portland State University, Portland, Oregon 97207-0751, United States

#### **Corresponding Author**

\* E-mail: [peytond@pdx.edu](mailto:peytond@pdx.edu)

#### **TABLE OF CONTENTS:**

|                          |                                                                                                                                                                                            |
|--------------------------|--------------------------------------------------------------------------------------------------------------------------------------------------------------------------------------------|
| <b>PAGE S-2 – S-3</b>    | <b>Materials &amp; Methods, <sup>1</sup>H NMR spectra, and a TOCSY for the identification of the “multiple addition products” (5.8+5.3+5.1 ppm MAPs) in aerosol samples</b>                |
| <b>PAGE S-4</b>          | <b>The % aerosol collected and degradation levels normalized relative to propylene glycol+glycerol (PG+GL) with and without 6 mg/mL nicotine</b>                                           |
| <b>PAGES S-5 – S-9</b>   | <b>Levels of degradation products normalized relative to PG+GL for each experiment</b>                                                                                                     |
| <b>PAGES S-10</b>        | <b><sup>1</sup>H NMR spectra for aged e-liquids with <i>trans</i>-cinnamaldehyde showing e-liquid composition changes over time</b>                                                        |
| <b>PAGES S-11 – S-14</b> | <b><sup>1</sup>H NMR spectra of aerosol samples from vaped e-liquids containing <i>trans</i>-cinnamaldehyde spiked with toluene, styrene, benzaldehyde, and <i>trans</i>-cinnamic acid</b> |
| <b>PAGE S-15</b>         | <b>References</b>                                                                                                                                                                          |

**Materials & methods and additional NMR data for the multiple addition product (MAP):**

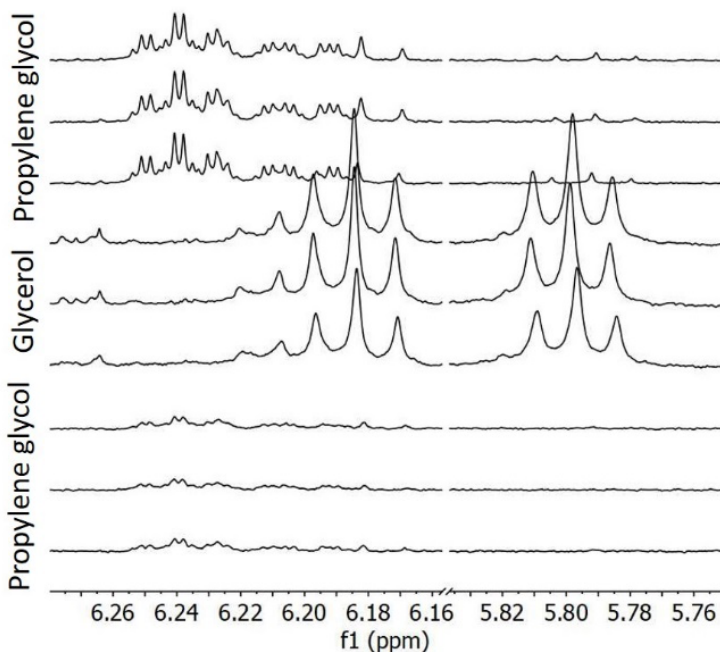

**Figure S1.** Spectra depict the single formaldehyde addition products (6.24 and 6.19 ppm) and the theorized multiple formaldehyde addition product (5.80 ppm MAP) by  $^1\text{H}$  NMR in either vaped propylene glycol (PG) or glycerol (GL) aerosol samples, respectively. Samples/spectra were generated in order from the bottom to the top. Three samples were collected for each condition and each sample contained 3 puffs. A Kangertech subtank mini was filled with PG, conditioned per methods described in the main manuscript, and vaped at 26 watts (bottom 3 spectra). The tank was emptied, cleaned with ethanol and lint-free tissues, and filled with GL. Wicking puffs were generated per methods described herein. Three vaped GL samples were collected. The tank was emptied, cleaned, and again filled with PG. Three samples were generated. The same 1.2  $\Omega$  coil was used for all samples. The single formaldehyde addition product was previously identified by Jensen et al.,<sup>1,2</sup> and can form from the addition of formaldehyde to either propylene glycol or glycerol. The 5.8 ppm MAP (shown in this figure) and 5.3 ppm MAP (not shown in this figure) only appears in the presence of glycerol and is theorized to form from the multiple addition of formaldehyde to glycerol, based on similarities to the spectra presented by Jensen et al. and 2D NMR experiments we conducted (Figure S2); these 2D experiments indicated connectivity of the 5.8 ppm triplet to at 4.6 doublet and another peak (splitting was not able to be observed due to peak overlap) at 3.4 ppm.

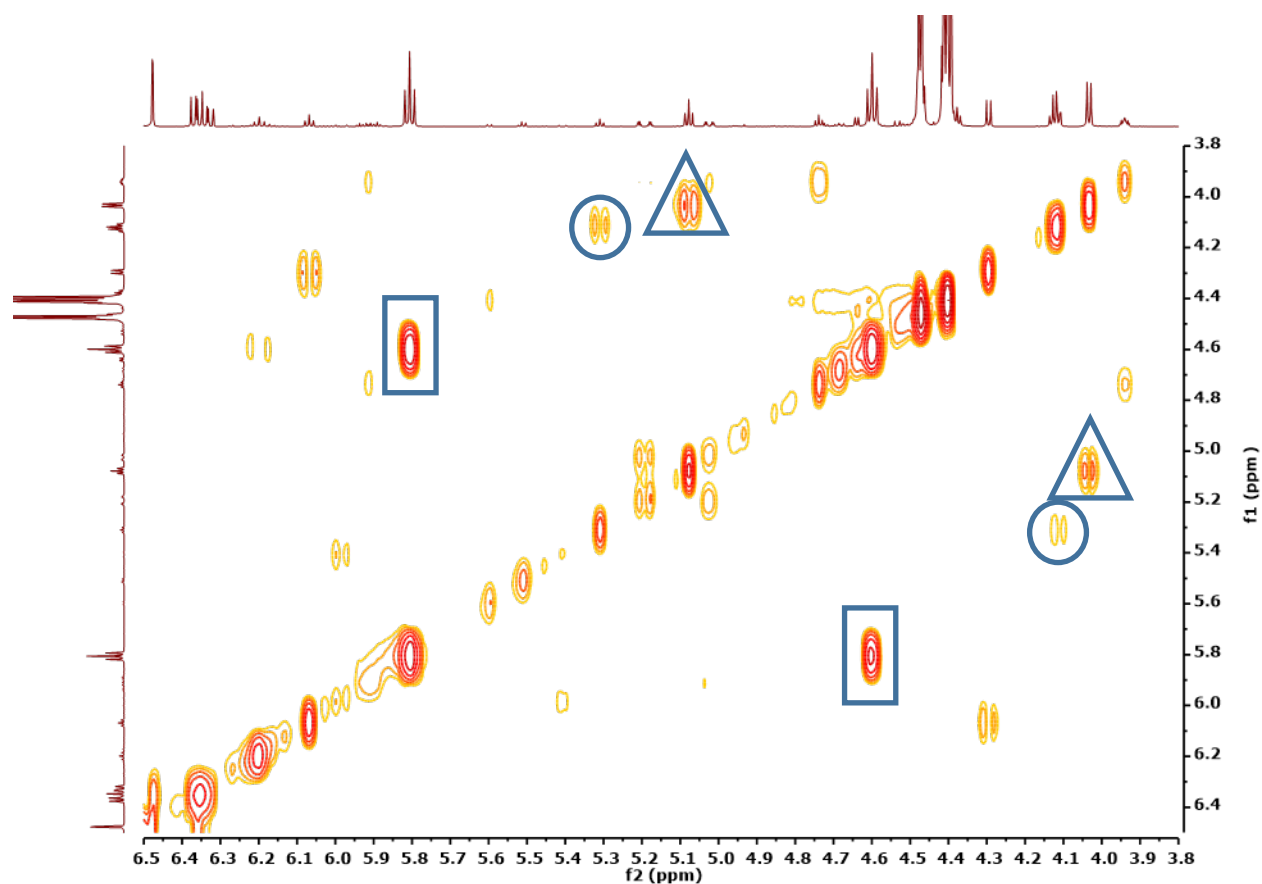

**Figure S2.** TOCSY of a vaped “Unicorn Blood” e-liquid sample containing the 5.8, 5.3, and 5.1 ppm MAPs (multiple addition products) showing connectivity between the MAP peaks at 5.8 (t) and 4.6 ppm (d); 5.3 ppm (t) and 4.1 ppm (d); and 5.1 ppm (t) and 4.0 ppm (d). The 5.8 (t), 5.3 (t), and 5.1 (t) ppm peaks disappeared when D<sub>2</sub>O was added to the sample. The 4.6 (d), 4.1 (d), and 4.0 (d) ppm peaks became singlets when the hemiacetal –CH<sub>2</sub>–OH is exchanged by D<sub>2</sub>O to form –CH<sub>2</sub>–OD. These resonances show TOCSY/COSY connectivities to the downfield triplets and are designated by boxes, circles, and triangles, respectively.

**Additional information regarding the aerosolization of e-liquids with nicotine:**

**Table S1.** The average % aerosol collected from the experiments with and without added nicotine

|                           |                | Average % aerosol collected $\pm$ standard deviation |                        |             |            |
|---------------------------|----------------|------------------------------------------------------|------------------------|-------------|------------|
|                           |                | PG+GL                                                | PG+GL+6 mg/mL nicotine | PG+GL       | Overall    |
| <b>Nicotine (6 mg/mL)</b> | <i>Trial 1</i> | 62 $\pm$ 12                                          | 69 $\pm$ 4             | 60 $\pm$ 6  | 63 $\pm$ 5 |
|                           | <i>Trial 2</i> | 41 $\pm$ 6                                           | 52 $\pm$ 9             | 53 $\pm$ 16 | 49 $\pm$ 7 |
|                           | <i>Trial 3</i> | 58 $\pm$ 1                                           | 58 $\pm$ 0             | 49 $\pm$ 3  | 55 $\pm$ 5 |

**Table S2.** The degradation levels of acetaldehyde, acrolein, and total formaldehyde <sup>$\alpha$</sup>  normalized relative to PG+GL from aerosolization of equimolar PG+GL, followed by sequential addition of 6 mg/mL nicotine

|                |                          | Amount of degradation (normalized relative to PG+GL) $\pm$ standard deviation |               |                                                   |
|----------------|--------------------------|-------------------------------------------------------------------------------|---------------|---------------------------------------------------|
|                |                          | Acetaldehyde                                                                  | Acrolein      | Total formaldehyde <sup><math>\alpha</math></sup> |
| <b>Trial 1</b> | <i>PG+GL</i>             | 1.0 $\pm$ 0.1                                                                 | 1.0 $\pm$ 0.1 | 1.0 $\pm$ 0.1                                     |
|                | <i>+6 mg/mL Nicotine</i> | 1.0 $\pm$ 0.1                                                                 | 1.1 $\pm$ 0.1 | 0.9 $\pm$ 0.1                                     |
| <b>Trial 2</b> | <i>PG+GL</i>             | 1.0 $\pm$ 0.2                                                                 | 1.0 $\pm$ 0.1 | 1.0 $\pm$ 0.1                                     |
|                | <i>+6 mg/mL Nicotine</i> | 1.0 $\pm$ 0.1                                                                 | 0.8 $\pm$ 0.1 | 0.9 $\pm$ 0.1                                     |
| <b>Trial 3</b> | <i>PG+GL</i>             | 1.0 $\pm$ 0.1                                                                 | 1.0 $\pm$ 0.2 | 1.0 $\pm$ 0.1                                     |
|                | <i>+6 mg/mL Nicotine</i> | 1.2 $\pm$ 0.1                                                                 | 1.0 $\pm$ 0.1 | 1.1 $\pm$ 0.1                                     |

<sup>$\alpha$</sup>  Formaldehyde+formaldehyde hemiacetal+total MAP; total MAPs = the 5.8+5.3+5.1 ppm multiple addition products.

**Additional data for the levels of degradation from each experiment:**

**Table S3.** The levels of degradation for each degradation product normalized relative to PG+GL from aerosolization of equimolar PG+GL, followed by sequential addition of flavorant, then 6 mg/mL nicotine.

|                                | Degradation product (as a % of remaining PG by <sup>1</sup> H NMR) ± standard deviation       |                                                                                                   |                                                                                                      |                                                                                                 |                                                                                                     |                                          |             | Total MAPs <sup>α</sup><br>(5.8, 5.3, 5.1 ppm) | Total Formaldehyde <sup>β</sup> |
|--------------------------------|-----------------------------------------------------------------------------------------------|---------------------------------------------------------------------------------------------------|------------------------------------------------------------------------------------------------------|-------------------------------------------------------------------------------------------------|-----------------------------------------------------------------------------------------------------|------------------------------------------|-------------|------------------------------------------------|---------------------------------|
|                                | Propanal<br>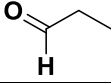 | Acetaldehyde<br> | Glycolaldehyde<br> | Acrolein<br> | Formaldehyde<br> | Formaldehyde<br>Hemiacetals<br>(6.2 ppm) |             |                                                |                                 |
| <b>Benzaldehyde trial 1</b>    |                                                                                               |                                                                                                   |                                                                                                      |                                                                                                 |                                                                                                     |                                          |             |                                                |                                 |
| PG+GL                          | 0.14 ± 0.01                                                                                   | 1.00 ± 0.14                                                                                       | 0.57 ± 0.03                                                                                          | 0.39 ± 0.04                                                                                     | 0.39 ± 0.14                                                                                         | 0.72 ± 0.02                              | 1.70 ± 0.08 | 2.81 ± 0.20                                    |                                 |
| +2.5 mg/mL benzaldehyde        | 0.26 ± 0.03                                                                                   | 1.64 ± 0.20                                                                                       | 0.70 ± 0.11                                                                                          | 0.55 ± 0.09                                                                                     | 1.40 ± 0.44                                                                                         | 0.78 ± 0.09                              | 2.21 ± 0.22 | 4.40 ± 0.63                                    |                                 |
| +6 mg/mL nicotine              | 0.18 ± 0.01                                                                                   | 1.30 ± 0.06                                                                                       | 0.37 ± 0.02                                                                                          | 0.49 ± 0.02                                                                                     | 0.60 ± 0.37                                                                                         | 1.00 ± 0.24                              | 1.64 ± 0.09 | 3.25 ± 0.17                                    |                                 |
| PG+GL                          | 0.22 ± 0.01                                                                                   | 1.63 ± 0.02                                                                                       | 0.62 ± 0.01                                                                                          | 0.58 ± 0.03                                                                                     | 0.99 ± 0.24                                                                                         | 0.95 ± 0.10                              | 2.71 ± 0.07 | 4.65 ± 0.07                                    |                                 |
| <b>Benzaldehyde trial 2</b>    |                                                                                               |                                                                                                   |                                                                                                      |                                                                                                 |                                                                                                     |                                          |             |                                                |                                 |
| PG+GL                          | 0.05 ± 0.01                                                                                   | 0.32 ± 0.01                                                                                       | 0.23 ± 0.02                                                                                          | 0.14 ± 0.01                                                                                     | 0.24 ± 0.05                                                                                         | 0.33 ± 0.02                              | 0.64 ± 0.03 | 1.21 ± 0.04                                    |                                 |
| +2.5 mg/mL benzaldehyde        | 0.07 ± 0.01                                                                                   | 0.53 ± 0.07                                                                                       | 0.33 ± 0.04                                                                                          | 0.21 ± 0.04                                                                                     | 0.64 ± 0.17                                                                                         | 0.41 ± 0.03                              | 0.89 ± 0.09 | 1.94 ± 0.28                                    |                                 |
| +6 mg/mL nicotine              | 0.06 ± 0.01                                                                                   | 0.37 ± 0.03                                                                                       | 0.14 ± 0.02                                                                                          | 0.16 ± 0.02                                                                                     | 0.42 ± 0.14                                                                                         | 0.29 ± 0.03                              | 0.49 ± 0.01 | 1.20 ± 0.13                                    |                                 |
| PG+GL                          | 0.05 ± 0.02                                                                                   | 0.34 ± 0.07                                                                                       | 0.21 ± 0.01                                                                                          | 0.09 ± 0.03                                                                                     | 0.17 ± 0.03                                                                                         | 0.43 ± 0.05                              | 0.61 ± 0.05 | 1.21 ± 0.13                                    |                                 |
| <b>Benzaldehyde trial 3</b>    |                                                                                               |                                                                                                   |                                                                                                      |                                                                                                 |                                                                                                     |                                          |             |                                                |                                 |
| PG+GL                          | 0.03 ± 0.01                                                                                   | 0.22 ± 0.07                                                                                       | 0.23 ± 0.02                                                                                          | 0.11 ± 0.04                                                                                     | 0.29 ± 0.09                                                                                         | 0.23 ± 0.06                              | 0.62 ± 0.07 | 1.14 ± 0.20                                    |                                 |
| +2.5 mg/mL benzaldehyde        | 0.04 ± 0.01                                                                                   | 0.37 ± 0.03                                                                                       | 0.26 ± 0.02                                                                                          | 0.18 ± 0.01                                                                                     | 0.54 ± 0.06                                                                                         | 0.32 ± 0.06                              | 0.73 ± 0.06 | 1.59 ± 0.06                                    |                                 |
| +6 mg/mL nicotine <sup>γ</sup> | 0.03 ± 0.01                                                                                   | 0.23 ± 0.01                                                                                       | 0.15 ± 0.01                                                                                          | 0.14 ± 0.02                                                                                     | 0.34 ± 0.09                                                                                         | 0.24 ± 0.04                              | 0.53 ± 0.03 | 1.11 ± 0.02                                    |                                 |
| <b>Vanillin trial 1</b>        |                                                                                               |                                                                                                   |                                                                                                      |                                                                                                 |                                                                                                     |                                          |             |                                                |                                 |
| PG+GL                          | 0.04 ± 0.01                                                                                   | 0.37 ± 0.02                                                                                       | 0.28 ± 0.01                                                                                          | 0.15 ± 0.02                                                                                     | 0.53 ± 0.05                                                                                         | 0.24 ± 0.01                              | 0.45 ± 0.02 | 1.22 ± 0.03                                    |                                 |
| +31 mg/mL vanillin             | 0.18 ± 0.05                                                                                   | 0.79 ± 0.08                                                                                       | 0.34 ± 0.06                                                                                          | 0.54 ± 0.04                                                                                     | 0.45 ± 0.38                                                                                         | 0.73 ± 0.21                              | 0.94 ± 0.26 | 2.12 ± 0.45                                    |                                 |
| +6 mg/mL nicotine              | 0.11 ± 0.03                                                                                   | 0.33 ± 0.06                                                                                       | 0.15 ± 0.03                                                                                          | 0.21 ± 0.03                                                                                     | 0.06 ± 0.04                                                                                         | 0.54 ± 0.05                              | 0.47 ± 0.07 | 1.07 ± 0.08                                    |                                 |
| PG+GL                          | 0.10 ± 0.01                                                                                   | 0.78 ± 0.01                                                                                       | 0.55 ± 0.02                                                                                          | 0.37 ± 0.04                                                                                     | 0.82 ± 0.23                                                                                         | 0.59 ± 0.11                              | 1.75 ± 0.03 | 3.16 ± 0.14                                    |                                 |

**Table S3.** Continued.

|                                | Degradation product (as a % of remaining PG by <sup>1</sup> H NMR) ± standard deviation       |                                                                                                   |                                                                                                      |                                                                                                 |                                                                                                     |                                          |             | Total MAP <sup>α</sup><br>(5.8, 5.3, 5.1 ppm) | Total Formaldehyde <sup>β</sup> |
|--------------------------------|-----------------------------------------------------------------------------------------------|---------------------------------------------------------------------------------------------------|------------------------------------------------------------------------------------------------------|-------------------------------------------------------------------------------------------------|-----------------------------------------------------------------------------------------------------|------------------------------------------|-------------|-----------------------------------------------|---------------------------------|
|                                | 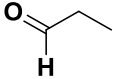<br>Propanal | <br>Acetaldehyde | <br>Glycolaldehyde | <br>Acrolein | <br>Formaldehyde | Formaldehyde<br>Hemiacetals<br>(6.2 ppm) |             |                                               |                                 |
| <b>Vanillin trial 2</b>        |                                                                                               |                                                                                                   |                                                                                                      |                                                                                                 |                                                                                                     |                                          |             |                                               |                                 |
| PG+GL                          | 0.04 ± 0.01                                                                                   | 0.06 ± 0.02                                                                                       | 0.07 ± 0.02                                                                                          | 0.03 ± 0.01                                                                                     | 0.04 ± 0.01                                                                                         | 0.06 ± 0.01                              | 0.18 ± 0.01 | 0.28 ± 0.02                                   |                                 |
| +31 mg/mL vanillin             | 0.06 ± 0.01                                                                                   | 0.18 ± 0.03                                                                                       | 0.09 ± 0.01                                                                                          | 0.12 ± 0.03                                                                                     | 0.05 ± 0.02                                                                                         | 0.13 ± 0.01                              | 0.28 ± 0.01 | 0.45 ± 0.01                                   |                                 |
| +6 mg/mL nicotine              | 0.02 ± 0.01                                                                                   | 0.06 ± 0.02                                                                                       | 0.02 ± 0.01                                                                                          | 0.03 ± 0.01                                                                                     | 0.01 ± 0.01                                                                                         | 0.05 ± 0.02                              | 0.18 ± 0.01 | 0.23 ± 0.02                                   |                                 |
| PG+GL                          | 0.02 ± 0.01                                                                                   | 0.25 ± 0.06                                                                                       | 0.20 ± 0.03                                                                                          | 0.13 ± 0.02                                                                                     | 0.10 ± 0.06                                                                                         | 0.26 ± 0.03                              | 0.16 ± 0.04 | 0.53 ± 0.11                                   |                                 |
| <b>Vanillin trial 3</b>        |                                                                                               |                                                                                                   |                                                                                                      |                                                                                                 |                                                                                                     |                                          |             |                                               |                                 |
| PG+GL                          | 0.28 ± 0.06                                                                                   | 1.63 ± 0.35                                                                                       | 0.49 ± 0.05                                                                                          | 0.90 ± 0.29                                                                                     | 1.01 ± 0.78                                                                                         | 0.80 ± 0.07                              | 1.16 ± 0.15 | 2.97 ± 0.61                                   |                                 |
| +31 mg/mL vanillin             | 0.73 ± 0.23                                                                                   | 3.20 ± 0.82                                                                                       | 0.72 ± 0.04                                                                                          | 1.88 ± 0.55                                                                                     | 1.38 ± 0.35                                                                                         | 1.53 ± 0.51                              | 1.88 ± 0.33 | 4.79 ± 0.37                                   |                                 |
| +6 mg/mL nicotine <sup>γ</sup> | 0.69 ± 0.07                                                                                   | 1.73 ± 0.30                                                                                       | 0.37 ± 0.10                                                                                          | 1.24 ± 0.19                                                                                     | 0.31 ± 0.29                                                                                         | 1.31 ± 0.02                              | 0.87 ± 0.25 | 2.49 ± 0.55                                   |                                 |
| <b>Benzyl alcohol trial 1</b>  |                                                                                               |                                                                                                   |                                                                                                      |                                                                                                 |                                                                                                     |                                          |             |                                               |                                 |
| PG+GL                          | 0.01 ± 0.01                                                                                   | 0.11 ± 0.01                                                                                       | 0.10 ± 0.01                                                                                          | 0.05 ± 0.01                                                                                     | 0.12 ± 0.03                                                                                         | 0.12 ± 0.01                              | 0.35 ± 0.01 | 0.58 ± 0.01                                   |                                 |
| +39 mg/mL benzyl alcohol       | 0.08 ± 0.01                                                                                   | 0.77 ± 0.07                                                                                       | 0.39 ± 0.04                                                                                          | 0.32 ± 0.02                                                                                     | 0.19 ± 0.04                                                                                         | 0.73 ± 0.10                              | 1.14 ± 0.13 | 2.05 ± 0.18                                   |                                 |
| +6 mg/mL nicotine              | 0.06 ± 0.01                                                                                   | 0.56 ± 0.05                                                                                       | 0.19 ± 0.01                                                                                          | 0.24 ± 0.01                                                                                     | 0.09 ± 0.07                                                                                         | 0.64 ± 0.02                              | 0.85 ± 0.03 | 1.59 ± 0.08                                   |                                 |
| PG+GL                          | 0.02 ± 0.01                                                                                   | 0.19 ± 0.04                                                                                       | 0.17 ± 0.06                                                                                          | 0.09 ± 0.01                                                                                     | 0.28 ± 0.07                                                                                         | 0.15 ± 0.07                              | 0.52 ± 0.13 | 0.94 ± 0.22                                   |                                 |
| <b>Benzyl alcohol trial 2</b>  |                                                                                               |                                                                                                   |                                                                                                      |                                                                                                 |                                                                                                     |                                          |             |                                               |                                 |
| PG+GL                          | 0.01 ± 0.01                                                                                   | 0.05 ± 0.04                                                                                       | 0.03 ± 0.01                                                                                          | 0.03 ± 0.02                                                                                     | 0.01 ± 0.01                                                                                         | 0.06 ± 0.04                              | 0.17 ± 0.05 | 0.24 ± 0.07                                   |                                 |
| +39 mg/mL benzyl alcohol       | 0.10 ± 0.01                                                                                   | 0.47 ± 0.03                                                                                       | 0.22 ± 0.03                                                                                          | 0.24 ± 0.02                                                                                     | 0.48 ± 0.13                                                                                         | 0.23 ± 0.03                              | 0.80 ± 0.04 | 1.51 ± 0.15                                   |                                 |
| +6 mg/mL nicotine              | 0.08 ± 0.01                                                                                   | 0.38 ± 0.02                                                                                       | 0.09 ± 0.01                                                                                          | 0.20 ± 0.01                                                                                     | 0.27 ± 0.10                                                                                         | 0.32 ± 0.03                              | 0.68 ± 0.03 | 1.27 ± 0.10                                   |                                 |
| PG+GL                          | 0.04 ± 0.01                                                                                   | 0.25 ± 0.06                                                                                       | 0.15 ± 0.02                                                                                          | 0.14 ± 0.02                                                                                     | 0.16 ± 0.09                                                                                         | 0.22 ± 0.03                              | 0.47 ± 0.03 | 0.84 ± 0.12                                   |                                 |
| <b>Benzyl alcohol trial 3</b>  |                                                                                               |                                                                                                   |                                                                                                      |                                                                                                 |                                                                                                     |                                          |             |                                               |                                 |
| PG+GL                          | 0.01 ± 0.01                                                                                   | 0.08 ± 0.03                                                                                       | 0.04 ± 0.01                                                                                          | 0.04 ± 0.01                                                                                     | 0.01 ± 0.01                                                                                         | 0.09 ± 0.03                              | 0.21 ± 0.02 | 0.30 ± 0.04                                   |                                 |
| +39 mg/mL benzyl alcohol       | 0.68 ± 0.03                                                                                   | 3.03 ± 0.22                                                                                       | 0.71 ± 0.06                                                                                          | 1.40 ± 0.08                                                                                     | 2.30 ± 0.63                                                                                         | 1.21 ± 0.21                              | 3.24 ± 0.62 | 6.75 ± 0.32                                   |                                 |
| +6 mg/mL nicotine <sup>γ</sup> | 0.60 ± 0.08                                                                                   | 2.19 ± 0.33                                                                                       | 0.53 ± 0.06                                                                                          | 1.05 ± 0.18                                                                                     | 1.32 ± 0.52                                                                                         | 1.16 ± 0.05                              | 3.04 ± 0.46 | 5.52 ± 0.85                                   |                                 |

Table S3. Continued.

|                                         | Degradation product (as a % of remaining PG by <sup>1</sup> H NMR) ± standard deviation       |                                                                                                   |                                                                                                      |                                                                                                 |                                                                                                     |                                    | Total MAP <sup>a</sup><br>(5.8, 5.3, 5.1 ppm) | Total Formaldehyde <sup>b</sup> |
|-----------------------------------------|-----------------------------------------------------------------------------------------------|---------------------------------------------------------------------------------------------------|------------------------------------------------------------------------------------------------------|-------------------------------------------------------------------------------------------------|-----------------------------------------------------------------------------------------------------|------------------------------------|-----------------------------------------------|---------------------------------|
|                                         | Propanal<br>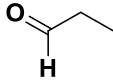 | Acetaldehyde<br> | Glycolaldehyde<br> | Acrolein<br> | Formaldehyde<br> | Formaldehyde Hemiacetals (6.2 ppm) |                                               |                                 |
| <b>Trans-cinnamaldehyde trial 1</b>     |                                                                                               |                                                                                                   |                                                                                                      |                                                                                                 |                                                                                                     |                                    |                                               |                                 |
| PG+GL                                   | 0.01 ± 0.01                                                                                   | 0.01 ± 0.01                                                                                       | 0.01 ± 0.01                                                                                          | 0.01 ± 0.01                                                                                     | 0.01 ± 0.01                                                                                         | NA <sup>c</sup>                    | 0.08 ± 0.03                                   | NA <sup>c</sup>                 |
| +39 mg/mL <i>trans</i> -cinnamaldehyde  | 0.07 ± 0.01                                                                                   | 0.25 ± 0.01                                                                                       | 0.16 ± 0.01                                                                                          | 0.16 ± 0.01                                                                                     | 0.33 ± 0.03                                                                                         | NA <sup>c</sup>                    | 0.47 ± 0.01                                   | NA <sup>c</sup>                 |
| +6 mg/mL nicotine                       | 0.31 ± 0.01                                                                                   | 0.77 ± 0.02                                                                                       | 0.29 ± 0.05                                                                                          | 0.54 ± 0.02                                                                                     | 0.73 ± 0.08                                                                                         | NA <sup>c</sup>                    | 1.16 ± 0.08                                   | NA <sup>c</sup>                 |
| PG+GL                                   | 0.12 ± 0.01                                                                                   | 0.55 ± 0.05                                                                                       | 0.33 ± 0.01                                                                                          | 0.40 ± 0.01                                                                                     | 0.73 ± 0.04                                                                                         | NA <sup>c</sup>                    | 1.08 ± 0.04                                   | NA <sup>c</sup>                 |
| <b>Trans-cinnamaldehyde trial 2</b>     |                                                                                               |                                                                                                   |                                                                                                      |                                                                                                 |                                                                                                     |                                    |                                               |                                 |
| PG+GL                                   | 0.01 ± 0.01                                                                                   | 0.01 ± 0.01                                                                                       | 0.03 ± 0.01                                                                                          | 0.01 ± 0.01                                                                                     | 0.02 ± 0.01                                                                                         | NA <sup>c</sup>                    | 0.14 ± 0.02                                   | NA <sup>c</sup>                 |
| +39 mg/mL <i>trans</i> -cinnamaldehyde  | 0.32 ± 0.01                                                                                   | 1.43 ± 0.19                                                                                       | 0.36 ± 0.06                                                                                          | 0.97 ± 0.07                                                                                     | 1.25 ± 0.13                                                                                         | NA <sup>c</sup>                    | 2.03 ± 0.15                                   | NA <sup>c</sup>                 |
| +6 mg/mL nicotine                       | 0.62 ± 0.04                                                                                   | 2.55 ± 0.12                                                                                       | 0.62 ± 0.03                                                                                          | 1.63 ± 0.14                                                                                     | 2.33 ± 0.18                                                                                         | NA <sup>c</sup>                    | 2.19 ± 0.16                                   | NA <sup>c</sup>                 |
| PG+GL                                   | 0.18 ± 0.01                                                                                   | 1.03 ± 0.14                                                                                       | 0.50 ± 0.02                                                                                          | 0.62 ± 0.05                                                                                     | 1.34 ± 0.20                                                                                         | NA <sup>c</sup>                    | 1.69 ± 0.02                                   | NA <sup>c</sup>                 |
| <b>Trans-cinnamaldehyde trial 3</b>     |                                                                                               |                                                                                                   |                                                                                                      |                                                                                                 |                                                                                                     |                                    |                                               |                                 |
| PG+GL                                   | 0.01 ± 0.01                                                                                   | 0.01 ± 0.01                                                                                       | 0.01 ± 0.01                                                                                          | 0.01 ± 0.01                                                                                     | 0.01 ± 0.01                                                                                         | NA <sup>c</sup>                    | 0.09 ± 0.01                                   | NA <sup>c</sup>                 |
| +39 mg/mL <i>trans</i> -cinnamaldehyde  | 0.22 ± 0.01                                                                                   | 1.16 ± 0.03                                                                                       | 0.20 ± 0.03                                                                                          | 0.89 ± 0.06                                                                                     | 0.74 ± 0.08                                                                                         | NA <sup>c</sup>                    | 1.83 ± 0.02                                   | NA <sup>c</sup>                 |
| +6 mg/mL nicotine                       | 0.66 ± 0.01                                                                                   | 2.18 ± 0.09                                                                                       | 0.35 ± 0.02                                                                                          | 1.63 ± 0.06                                                                                     | 1.57 ± 0.15                                                                                         | NA <sup>c</sup>                    | 1.83 ± 0.05                                   | NA <sup>c</sup>                 |
| PG+GL                                   | 0.38 ± 0.04                                                                                   | 1.57 ± 0.31                                                                                       | 0.42 ± 0.08                                                                                          | 1.25 ± 0.11                                                                                     | 1.51 ± 0.27                                                                                         | NA <sup>c</sup>                    | 2.03 ± 0.16                                   | NA <sup>c</sup>                 |
| <b>Trans-cinnamaldehyde trial 1</b>     |                                                                                               |                                                                                                   |                                                                                                      |                                                                                                 |                                                                                                     |                                    |                                               |                                 |
| PG+GL                                   | 0.02 ± 0.01                                                                                   | 0.07 ± 0.01                                                                                       | 0.06 ± 0.02                                                                                          | 0.04 ± 0.01                                                                                     | 0.04 ± 0.03                                                                                         | NA <sup>c</sup>                    | 0.22 ± 0.06                                   | NA <sup>c</sup>                 |
| +155 mg/mL <i>trans</i> -cinnamaldehyde | 1.35 ± 0.11                                                                                   | 3.54 ± 0.90                                                                                       | 0.89 ± 0.15                                                                                          | 2.82 ± 0.58                                                                                     | 2.93 ± 0.58                                                                                         | NA <sup>c</sup>                    | 3.46 ± 0.68                                   | NA <sup>c</sup>                 |
| +6 mg/mL nicotine                       | 4.40 ± 0.31                                                                                   | 12.02 ± 1.86                                                                                      | 1.10 ± 0.20                                                                                          | 9.05 ± 1.39                                                                                     | 6.45 ± 1.56                                                                                         | NA <sup>c</sup>                    | 7.97 ± 1.47                                   | NA <sup>c</sup>                 |
| PG+GL                                   | 0.54 ± 0.18                                                                                   | 1.95 ± 0.46                                                                                       | 0.51 ± 0.14                                                                                          | 1.33 ± 0.22                                                                                     | 1.18 ± 0.54                                                                                         | NA <sup>c</sup>                    | 2.45 ± 0.25                                   | NA <sup>c</sup>                 |
| <b>Trans-cinnamaldehyde trial 2</b>     |                                                                                               |                                                                                                   |                                                                                                      |                                                                                                 |                                                                                                     |                                    |                                               |                                 |
| PG+GL                                   | 0.38 ± 0.02                                                                                   | 1.71 ± 0.11                                                                                       | 0.52 ± 0.04                                                                                          | 0.63 ± 0.07                                                                                     | 1.52 ± 0.17                                                                                         | NA <sup>c</sup>                    | 1.92 ± 0.01                                   | NA <sup>c</sup>                 |
| +155 mg/mL <i>trans</i> -cinnamaldehyde | 1.74 ± 0.12                                                                                   | 7.32 ± 0.26                                                                                       | 1.42 ± 0.04                                                                                          | 5.54 ± 0.75                                                                                     | 6.44 ± 0.11                                                                                         | NA <sup>c</sup>                    | 7.25 ± 0.55                                   | NA <sup>c</sup>                 |
| +6 mg/mL nicotine                       | 7.93 ± 0.24                                                                                   | 25.53 ± 1.24                                                                                      | 2.19 ± 0.07                                                                                          | 19.76 ± 1.02                                                                                    | 15.45 ± 0.67                                                                                        | NA <sup>c</sup>                    | 18.54 ± 0.31                                  | NA <sup>c</sup>                 |
| PG+GL                                   | 0.30 ± 0.01                                                                                   | 1.89 ± 0.17                                                                                       | 0.74 ± 0.10                                                                                          | 0.95 ± 0.09                                                                                     | 1.75 ± 0.22                                                                                         | NA <sup>c</sup>                    | 2.55 ± 0.10                                   | NA <sup>c</sup>                 |

Table S3. Continued.

|                                         | Degradation product (as a % of remaining PG by <sup>1</sup> H NMR) ± standard deviation       |                                                                                                   |                                                                                                      |                                                                                                 |                                                                                                     |                                    | Total MAP <sup>a</sup><br>(5.8, 5.3, 5.1 ppm) | Total Formaldehyde <sup>b</sup> |
|-----------------------------------------|-----------------------------------------------------------------------------------------------|---------------------------------------------------------------------------------------------------|------------------------------------------------------------------------------------------------------|-------------------------------------------------------------------------------------------------|-----------------------------------------------------------------------------------------------------|------------------------------------|-----------------------------------------------|---------------------------------|
|                                         | Propanal<br>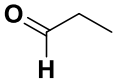 | Acetaldehyde<br> | Glycolaldehyde<br> | Acrolein<br> | Formaldehyde<br> | Formaldehyde Hemiacetals (6.2 ppm) |                                               |                                 |
| <b>Trans-cinnamaldehyde trial 3</b>     |                                                                                               |                                                                                                   |                                                                                                      |                                                                                                 |                                                                                                     |                                    |                                               |                                 |
| PG+GL                                   | 0.37 ± 0.02                                                                                   | 2.38 ± 0.23                                                                                       | 0.84 ± 0.058                                                                                         | 1.162 ± 0.21                                                                                    | 1.32 ± 0.41                                                                                         | NA <sup>c</sup>                    | 4.06 ± 1.12                                   | NA <sup>c</sup>                 |
| +155 mg/mL <i>trans</i> -cinnamaldehyde | 2.52 ± 0.34                                                                                   | 12.99 ± 1.20                                                                                      | 1.95 ± 0.03                                                                                          | 9.99 ± 1.19                                                                                     | 10.17 ± 0.92                                                                                        | NA <sup>c</sup>                    | 11.68 ± 1.25                                  | NA <sup>c</sup>                 |
| +6 mg/mL nicotine <sup>y</sup>          | 7.75 ± 2.46                                                                                   | 22.66 ± 4.56                                                                                      | 1.86 ± 0.43                                                                                          | 19.71 ± 4.40                                                                                    | 16.58 ± 7.28                                                                                        | NA <sup>c</sup>                    | 9.50 ± 2.07                                   | NA <sup>c</sup>                 |
| <b>Flavorant mixture trial 1</b>        |                                                                                               |                                                                                                   |                                                                                                      |                                                                                                 |                                                                                                     |                                    |                                               |                                 |
| PG+GL                                   | 0.01 ± 0.01                                                                                   | 0.02 ± 0.01                                                                                       | 0.02 ± 0.01                                                                                          | 0.02 ± 0.01                                                                                     | 0.02 ± 0.01                                                                                         | NA <sup>c</sup>                    | 0.10 ± 0.01                                   | NA <sup>c</sup>                 |
| +flavorant mixture <sup>δ</sup>         | 0.11 ± 0.01                                                                                   | 0.32 ± 0.01                                                                                       | 0.16 ± 0.01                                                                                          | 0.23 ± 0.01                                                                                     | 0.31 ± 0.01                                                                                         | NA <sup>c</sup>                    | 0.64 ± 0.03                                   | NA <sup>c</sup>                 |
| +6 mg/mL nicotine                       | 0.07 ± 0.01                                                                                   | 0.25 ± 0.02                                                                                       | 0.11 ± 0.01                                                                                          | 0.15 ± 0.02                                                                                     | 0.21 ± 0.01                                                                                         | NA <sup>c</sup>                    | 0.49 ± 0.02                                   | NA <sup>c</sup>                 |
| PG+GL                                   | 0.02 ± 0.01                                                                                   | 0.15 ± 0.04                                                                                       | 0.20 ± 0.03                                                                                          | 0.08 ± 0.02                                                                                     | 0.27 ± 0.05                                                                                         | NA <sup>c</sup>                    | 0.50 ± 0.07                                   | NA <sup>c</sup>                 |
| <b>Flavorant mixture trial 2</b>        |                                                                                               |                                                                                                   |                                                                                                      |                                                                                                 |                                                                                                     |                                    |                                               |                                 |
| PG+GL                                   | 0.01 ± 0.01                                                                                   | 0.02 ± 0.01                                                                                       | 0.04 ± 0.02                                                                                          | 0.01 ± 0.01                                                                                     | 0.02 ± 0.01                                                                                         | NA <sup>c</sup>                    | 0.14 ± 0.01                                   | NA <sup>c</sup>                 |
| +flavorant mixture <sup>δ</sup>         | 0.10 ± 0.01                                                                                   | 0.41 ± 0.04                                                                                       | 0.20 ± 0.01                                                                                          | 0.31 ± 0.04                                                                                     | 0.49 ± 0.05                                                                                         | NA <sup>c</sup>                    | 0.74 ± 0.03                                   | NA <sup>c</sup>                 |
| +6 mg/mL nicotine                       | 0.10 ± 0.01                                                                                   | 0.29 ± 0.04                                                                                       | 0.11 ± 0.01                                                                                          | 0.20 ± 0.04                                                                                     | 0.21 ± 0.04                                                                                         | NA <sup>c</sup>                    | 0.60 ± 0.08                                   | NA <sup>c</sup>                 |
| PG+GL                                   | 0.06 ± 0.01                                                                                   | 0.40 ± 0.05                                                                                       | 0.27 ± 0.01                                                                                          | 0.20 ± 0.01                                                                                     | 0.54 ± 0.04                                                                                         | NA <sup>c</sup>                    | 0.67 ± 0.06                                   | NA <sup>c</sup>                 |
| <b>Flavorant mixture trial 3</b>        |                                                                                               |                                                                                                   |                                                                                                      |                                                                                                 |                                                                                                     |                                    |                                               |                                 |
| PG+GL                                   | 0.01 ± 0.01                                                                                   | 0.05 ± 0.04                                                                                       | 0.08 ± 0.01                                                                                          | 0.02 ± 0.01                                                                                     | 0.01 ± 0.01                                                                                         | NA <sup>c</sup>                    | 0.25 ± 0.05                                   | NA <sup>c</sup>                 |
| +flavorant mixture <sup>δ</sup>         | 0.14 ± 0.02                                                                                   | 0.47 ± 0.03                                                                                       | 0.24 ± 0.04                                                                                          | 0.38 ± 0.05                                                                                     | 0.54 ± 0.01                                                                                         | NA <sup>c</sup>                    | 0.85 ± 0.07                                   | NA <sup>c</sup>                 |
| +6 mg/mL nicotine                       | 0.08 ± 0.01                                                                                   | 0.19 ± 0.03                                                                                       | 0.11 ± 0.01                                                                                          | 0.13 ± 0.02                                                                                     | 0.18 ± 0.03                                                                                         | NA <sup>c</sup>                    | 0.47 ± 0.04                                   | NA <sup>c</sup>                 |
| PG+GL                                   | 0.03 ± 0.01                                                                                   | 0.21 ± 0.04                                                                                       | 0.15 ± 0.03                                                                                          | 0.10 ± 0.01                                                                                     | 0.26 ± 0.04                                                                                         | NA <sup>c</sup>                    | 0.40 ± 0.07                                   | NA <sup>c</sup>                 |
| <b>Nicotine trial 1</b>                 |                                                                                               |                                                                                                   |                                                                                                      |                                                                                                 |                                                                                                     |                                    |                                               |                                 |
| PG+GL                                   | 0.14 ± 0.01                                                                                   | 0.90 ± 0.06                                                                                       | 0.48 ± 0.01                                                                                          | 0.35 ± 0.04                                                                                     | 1.10 ± 0.08                                                                                         | 0.32 ± 0.05                        | 0.50 ± 0.02                                   | 1.05 ± 0.10                     |
| +6 mg/mL nicotine                       | 0.16 ± 0.01                                                                                   | 0.88 ± 0.10                                                                                       | 0.28 ± 0.02                                                                                          | 0.37 ± 0.03                                                                                     | 0.71 ± 0.01                                                                                         | 0.54 ± 0.09                        | 0.37 ± 0.02                                   | 0.95 ± 0.06                     |
| PG+GL                                   | 0.14 ± 0.01                                                                                   | 0.84 ± 0.10                                                                                       | 0.50 ± 0.06                                                                                          | 0.36 ± 0.05                                                                                     | 1.11 ± 0.17                                                                                         | 0.29 ± 0.03                        | 0.57 ± 0.10                                   | 1.07 ± 0.12                     |



Table S3. Continued.

|                         | Degradation product (as a % of remaining PG by <sup>1</sup> H NMR) ± standard deviation       |                                                                                                   |                                                                                                      |                                                                                                 |                                                                                                     |                                          |                                                  |                                    |
|-------------------------|-----------------------------------------------------------------------------------------------|---------------------------------------------------------------------------------------------------|------------------------------------------------------------------------------------------------------|-------------------------------------------------------------------------------------------------|-----------------------------------------------------------------------------------------------------|------------------------------------------|--------------------------------------------------|------------------------------------|
|                         | 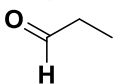<br>Propanal | <br>Acetaldehyde | <br>Glycolaldehyde | <br>Acrolein | <br>Formaldehyde | Formaldehyde<br>Hemiacetals<br>(6.2 ppm) | Total MAP <sup>α</sup><br>(5.8, 5.3, 5.1<br>ppm) | Total<br>Formaldehyde <sup>β</sup> |
| <b>Nicotine trial 2</b> |                                                                                               |                                                                                                   |                                                                                                      |                                                                                                 |                                                                                                     |                                          |                                                  |                                    |
| PG+GL                   | 0.04 ± 0.01                                                                                   | 0.27 ± 0.05                                                                                       | 0.17 ± 0.01                                                                                          | 0.11 ± 0.01                                                                                     | 0.31 ± 0.08                                                                                         | 0.23 ± 0.02                              | 1.53 ± 0.06                                      | 2.95 ± 0.03                        |
| +6 mg/mL nicotine       | 0.04 ± 0.01                                                                                   | 0.27 ± 0.03                                                                                       | 0.09 ± 0.02                                                                                          | 0.09 ± 0.01                                                                                     | 0.34 ± 0.09                                                                                         | 0.24 ± 0.04                              | 1.30 ± 0.09                                      | 2.55 ± 0.19                        |
| PG+GL                   | 0.03 ± 0.01                                                                                   | 0.21 ± 0.03                                                                                       | 0.18 ± 0.04                                                                                          | 0.09 ± 0.02                                                                                     | 0.35 ± 0.07                                                                                         | 0.15 ± 0.07                              | 1.49 ± 0.06                                      | 2.88 ± 0.18                        |
| <b>Nicotine trial 3</b> |                                                                                               |                                                                                                   |                                                                                                      |                                                                                                 |                                                                                                     |                                          |                                                  |                                    |
| PG+GL                   | 0.12 ± 0.01                                                                                   | 0.96 ± 0.13                                                                                       | 0.50 ± 0.05                                                                                          | 0.36 ± 0.07                                                                                     | 1.10 ± 0.17                                                                                         | 0.49 ± 0.17                              | 1.44 ± 0.12                                      | 3.02 ± 0.08                        |
| +6 mg/mL nicotine       | 0.14 ± 0.01                                                                                   | 1.11 ± 0.06                                                                                       | 0.41 ± 0.05                                                                                          | 0.36 ± 0.02                                                                                     | 0.91 ± 0.28                                                                                         | 0.82 ± 0.09                              | 1.50 ± 0.11                                      | 3.22 ± 0.28                        |
| PG+GL                   | 0.08 ± 0.01                                                                                   | 0.77 ± 0.13                                                                                       | 0.59 ± 0.04                                                                                          | 0.32 ± 0.12                                                                                     | 1.05 ± 0.31                                                                                         | 0.37 ± 0.10                              | 1.40 ± 0.06                                      | 2.82 ± 0.28                        |

<sup>α</sup> Total MAPs = the 5.8+5.3+5.1 ppm multiple addition products.

<sup>β</sup> Total formaldehyde = formaldehyde+formaldehyde hemiacetal+total MAPs.

<sup>γ</sup> PG+GL was not aerosolized again after the +6 mg/mL nicotine addition.

<sup>δ</sup> Flavorant mixture = 0.025 mg/mL benzaldehyde; 7.75 mg/mL vanillin; 9.75 mg/mL benzyl alcohol; 39 mg/mL *trans*-cinnamaldehyde.

<sup>ε</sup> Not able to be analyzed due to peak overlap.

<sup>1</sup>H NMR of aged e-liquids with *trans*-cinnamaldehyde:

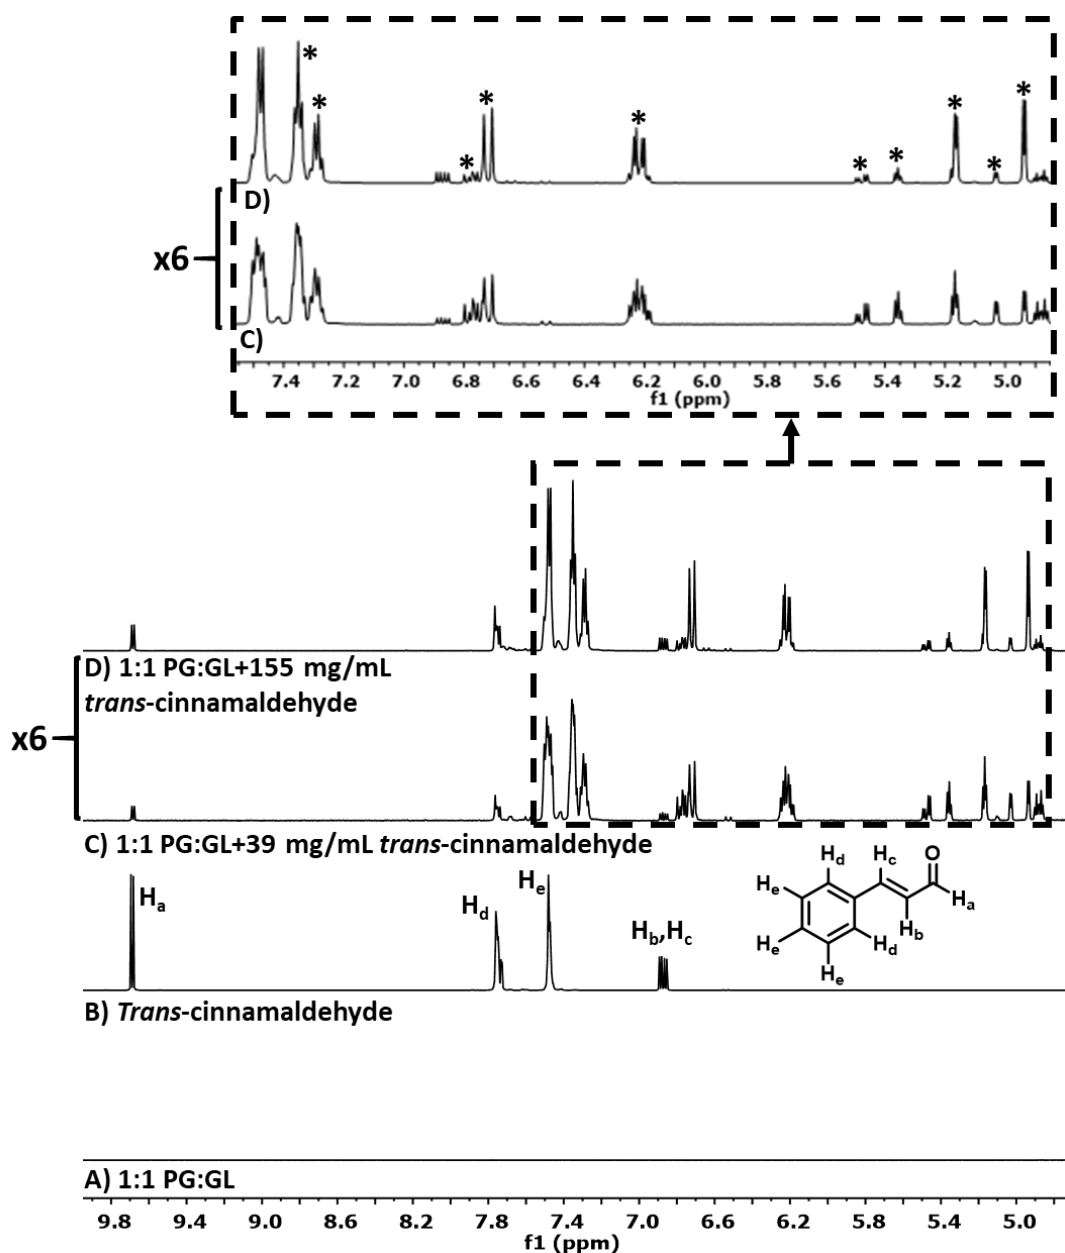

Figure S3. <sup>1</sup>H

NMR spectra for the unvaped (A) equimolar PG:GL, (B) *trans*-cinnamaldehyde standard, (C) PG:GL+39 mg/mL *trans*-cinnamaldehyde (~2 weeks old), and (D) PG:GL+155 mg/mL *trans*-cinnamaldehyde (~2 months old) in DMSO-*d*<sub>6</sub>. The (D) PG:GL+155 mg/mL *trans*-cinnamaldehyde was formulated first, followed by the (C) PG:GL+39 mg/mL *trans*-cinnamaldehyde ~6 weeks later, and then ~2 weeks later we analyzed both (D) and (C) with <sup>1</sup>H NMR spectroscopy. E-liquids in spectra (C) and (D) reached equilibrium sometime within their incubation time. Spectra A, C, and D were normalized to the PG methyl peak at ~1.05 ppm, and spectrum C was expanded by x6. The peaks with an "\*" above them are not from PG, GL, or *trans*-cinnamaldehyde, and are from PG- and GL-*trans*-cinnamaldehyde acetals. The region between 5.0 and 7.4 ppm for spectra C and D show many of the peaks associated with the PG- and GL-*trans*-cinnamaldehyde acetals.

<sup>1</sup>H of spiked aerosol samples:

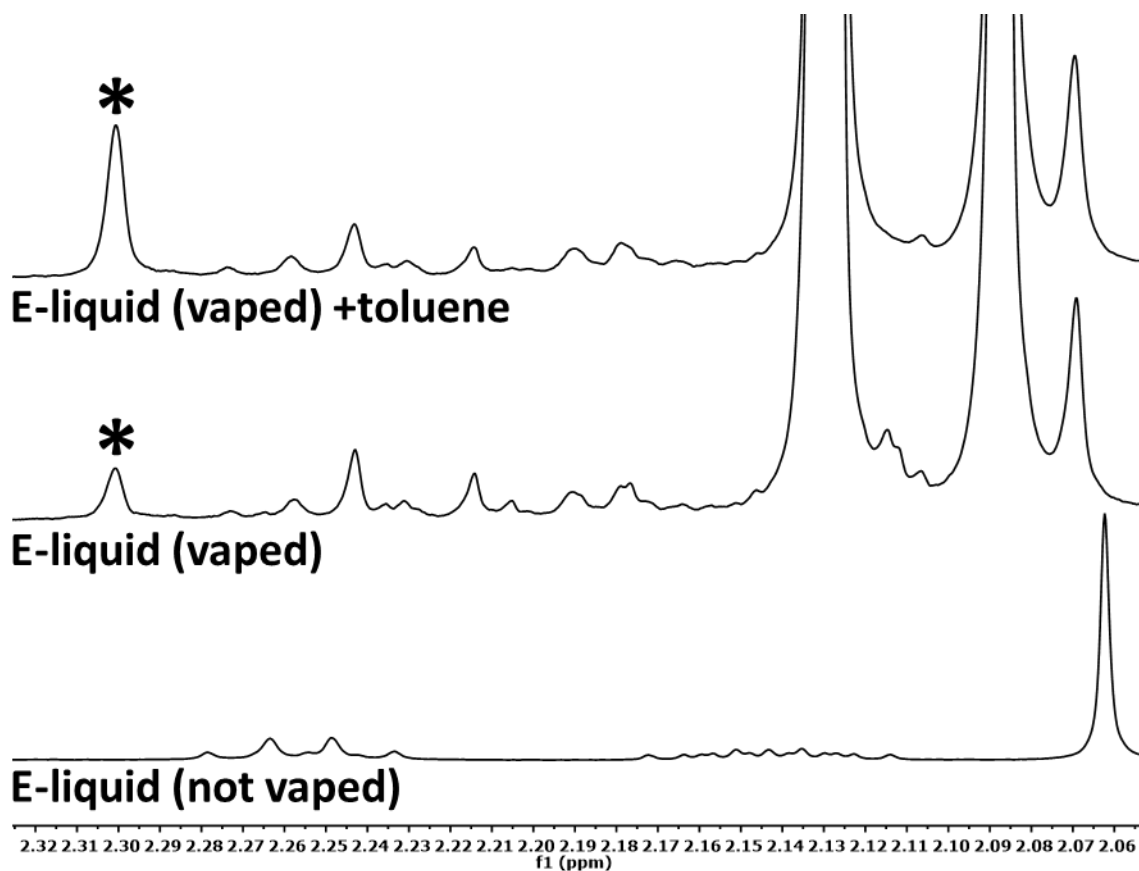

**Figure S4.** A vaped e-liquid (PG+GL+155 mg/mL *trans*-cinnamaldehyde+6 mg/mL nicotine) sample was spiked with toluene which resulted in an increase for the unknown peak at ~2.30 ppm (shown with an “\*” above the peak) in the <sup>1</sup>H NMR spectra. This suggests that toluene was formed during aerosolization and is a degradation product of the PG+GL+155 mg/mL *trans*-cinnamaldehyde+6 mg/mL nicotine e-liquid.

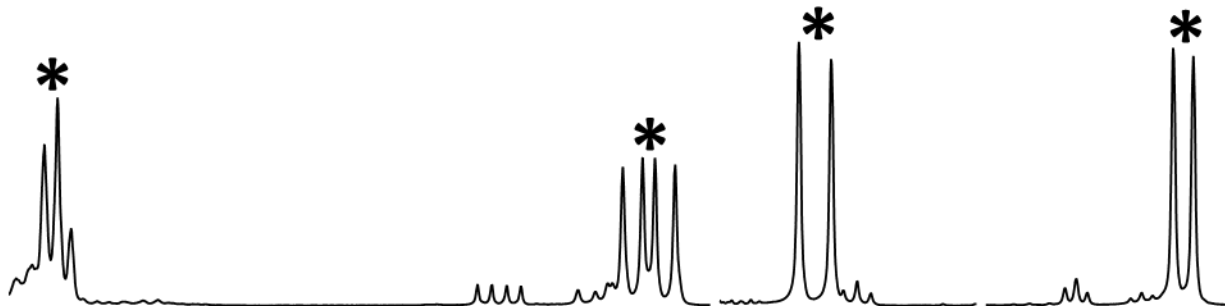

**E-liquid (vaped)+styrene**

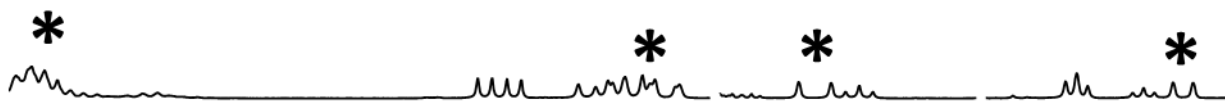

**E-liquid (vaped)**

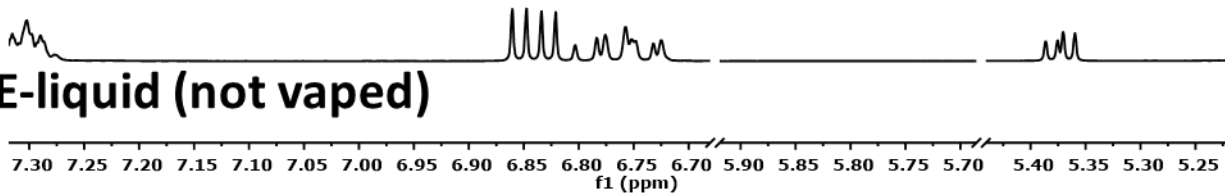

**E-liquid (not vaped)**

**Figure S5.** The peaks at 5.25, 5.83, 6.70-6.75 and 7.30 ppm (shown with an “\*” above the peaks) in the  $^1\text{H}$  NMR spectra increased when styrene was added to a vaped e-liquid sample containing PG+GL+155 mg/mL *trans*-cinnamaldehyde+6 mg/mL nicotine. This suggests that styrene was formed during aerosolization and is a degradation product of the PG+GL+155 mg/mL *trans*-cinnamaldehyde+6 mg/mL nicotine e-liquid.

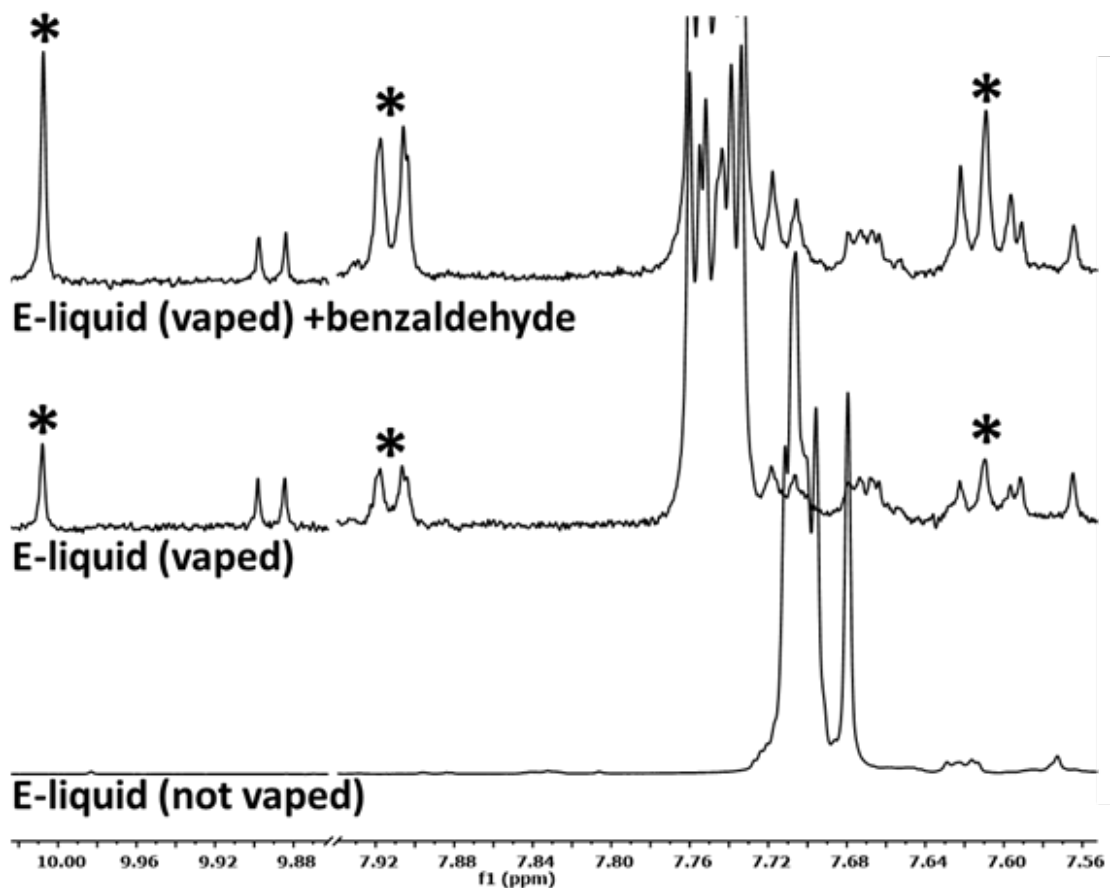

**Figure S6.** Benzaldehyde was added to a vaped e-liquid composed of PG+GL+155 mg/mL *trans*-cinnamaldehyde+6 mg/mL nicotine which resulted in an increase of the peaks at 7.61, 7.91, and 10.01 ppm (shown with an “\*” above the peaks) in the  $^1\text{H}$  NMR spectra. This suggests that benzaldehyde was formed during aerosolization and is a degradation product of the PG+GL+155 mg/mL *trans*-cinnamaldehyde+6 mg/mL nicotine e-liquid.

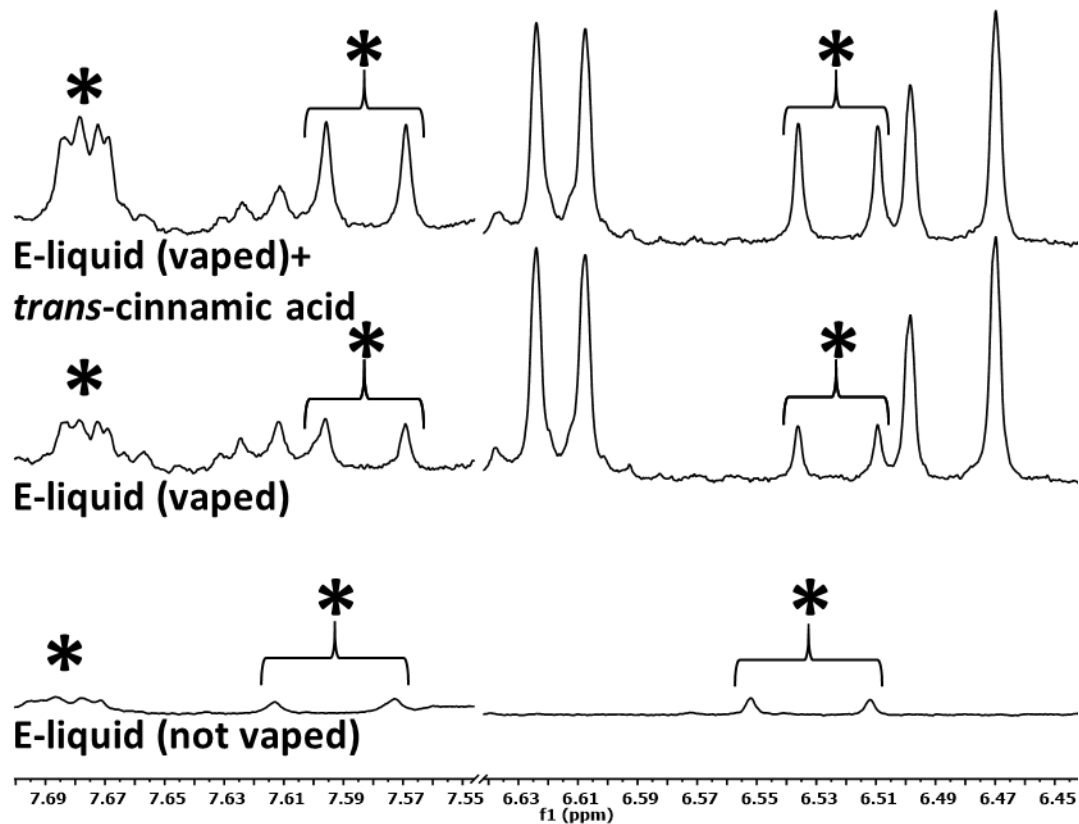

**Figure S7.** There was an increase in the unknown peaks at 6.52, 7.58, and 7.68 ppm (shown with an “\*” above the peaks) in the  $^1\text{H}$  NMR spectra when *trans*-cinnamic acid was added to a vaped e-liquid containing PG+GL+155 mg/mL *trans*-cinnamaldehyde. The J-coupling for the doublets at 6.52 and 7.58 ppm were confirmed to be similar values. This suggests that *trans*-cinnamic acid was formed during aerosolization and is a degradation product of the PG+GL+155 mg/mL *trans*-cinnamaldehyde e-liquid.

## REFERENCES

(1) Jensen, R. P.; Luo, W.; Pankow, J. F.; Strongin, R. M.; Peyton, D. H. Hidden formaldehyde in e-cigarette aerosols. *N Engl J Med* **2015**, *372* (4), 392-394. DOI: 10.1056/NEJMc1413069.

(2) Jensen, R. P.; Strongin, R. M.; Peyton, D. H. Solvent Chemistry in the Electronic Cigarette Reaction Vessel. *Sci Rep* **2017**, *7*, 42549. DOI: 10.1038/srep42549.
